# Supplementary material
Source: Springer Nature journal article supplement (https://www.springermedizin.de/resource/supplementary/12245_2012_108_MOESM1_ESM.pdf/9672790)
Supplement: MOESM1 [file 9672790]

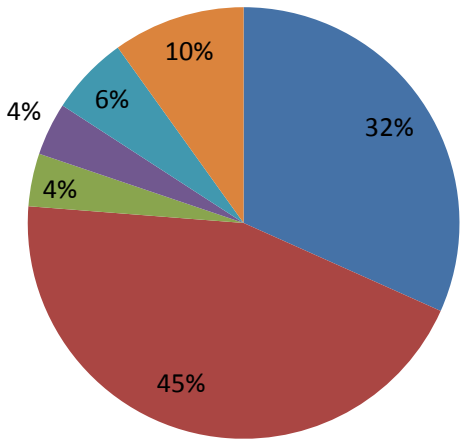

- Fall n=37
- \*Road Traffic Injury n=59
- Assault/Fight n=5
- Burn n=5
- Cut or Laceration not related to fight n=7
- Other n=11
